# Supplementary material
Source: Springer Nature journal article supplement (https://www.springermedizin.de/resource/supplementary/12913_2009_985_MOESM2_ESM.pdf/9536074)
Supplement: MOESM2 [file 9536074]

**Table 1: 3x3 allocation table.**

|                      | Intervention allocation |                                       |                                       | Total                                 |                                       |
|----------------------|-------------------------|---------------------------------------|---------------------------------------|---------------------------------------|---------------------------------------|
|                      |                         | PIL                                   | BA                                    | BLC                                   |                                       |
| Screening allocation | FAST                    | AED = 1<br>Participants = 131         | AED = 1<br>Participants = 131         | AED = 1<br>Participants = 131         | <b>AED = 3<br/>Participants = 393</b> |
|                      | SASQ                    | AED = 1<br>Participants = 131         | AED = 1<br>Participants = 131         | AED = 1<br>Participants = 131         | <b>AED = 3<br/>Participants = 393</b> |
|                      | PAT                     | AED = 1<br>Participants = 131         | AED = 1<br>Participants = 131         | AED = 1<br>Participants = 131         | <b>AED = 3<br/>Participants = 393</b> |
| Total                |                         | <b>AED = 3<br/>Participants = 393</b> |
